# Supplementary material for: Cannabis constituents interact at the drug efflux pump BCRP to markedly increase plasma cannabidiolic acid concentrations
Source: Sci Rep. 2021 Jul 22;11:14948. doi: 10.1038/s41598-021-94212-6 (PMC8298633; doi:10.1038/s41598-021-94212-6)
Supplement: Supplementary file 1 — Supplementary Table. [file 41598_2021_94212_MOESM1_ESM.xlsx]

## Sheet: Sheet1
Supplemental Table 1. Cannabinoid content of full-spectrum cannabis extract
Cannabinoid	Percent content (w/w)
CBC	2.2 ± 0.1
CBD	5.5 ± 0.1
CBDA	11.5 ± 0.1
CBDV	0.1 ± 0.0
CBDVA	1.5 ± 0.1
CBG	0.3 ± 0.0
CBGA	1.6 ± 0.0
CBN	0.5 ± 0.0
Δ9-THC	3.4 ± 0.1
Δ9-THCA	11.5 ± 0.1
Δ9-THCV	0.1 ± 0.0
